# Supplementary material for: On the Vertical Accuracy of the ALOS World 3D-30m Digital Elevation Model
Source: Preprints.org preprint supplement (doi:10.20944/preprints201708.0081.v1), 2017-08-24

Plots of elevation differences for 36 runways considered in the project.

Bayık et al. 2017. On the Vertical Accuracy of the ALOS World 3D-30m (AW3D30) Digital Elevation Model using the Runway Method (RWYM)

Note:

1. The plots are ordered from left to right and top left to bottom right on each page. The order of the plots matches the order of records in Table 1.
2. The length of runways has been normalized (0 to 1).

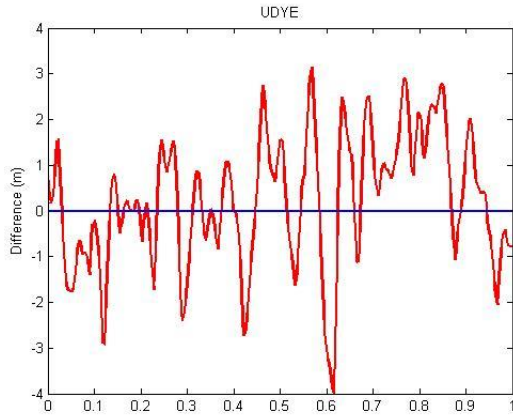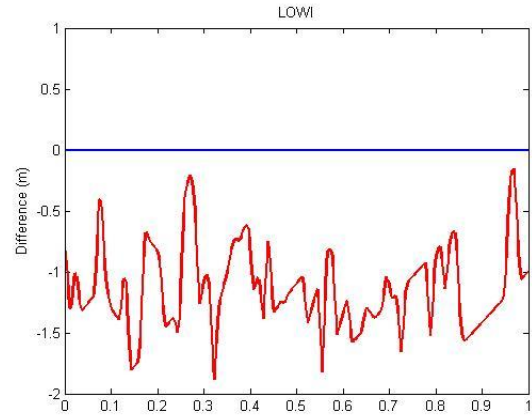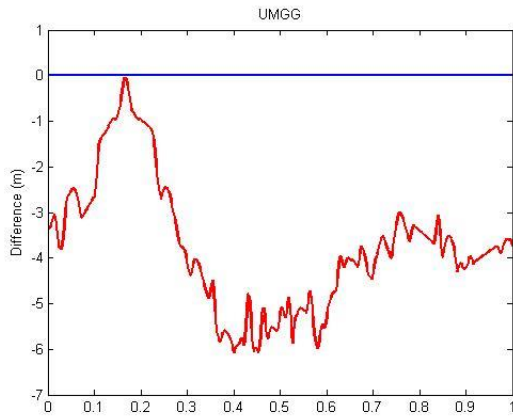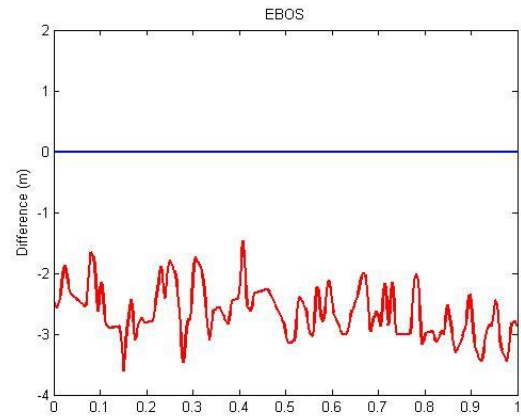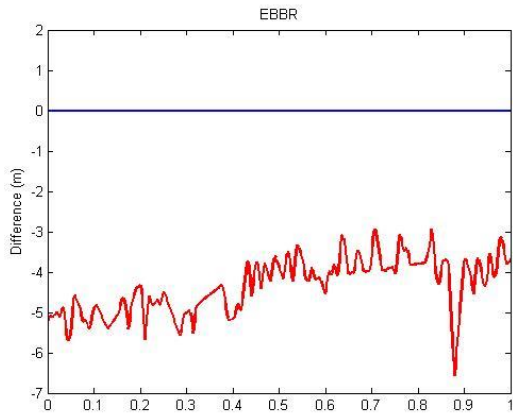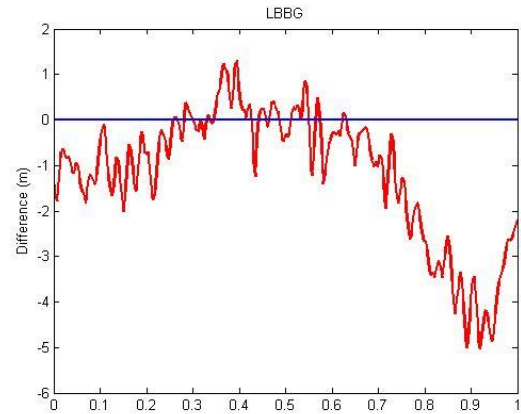

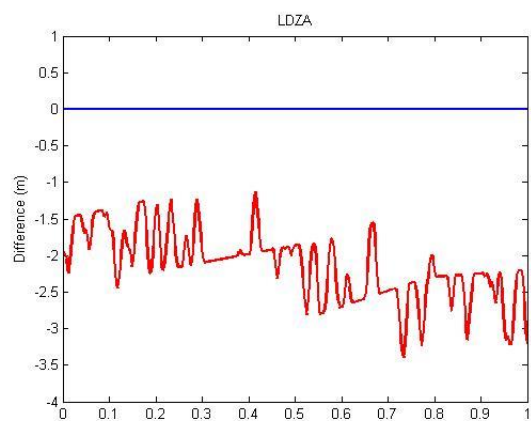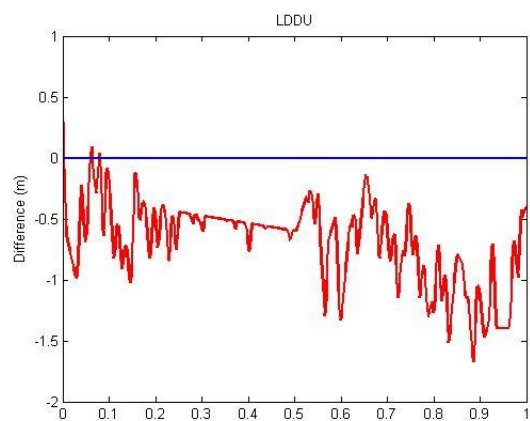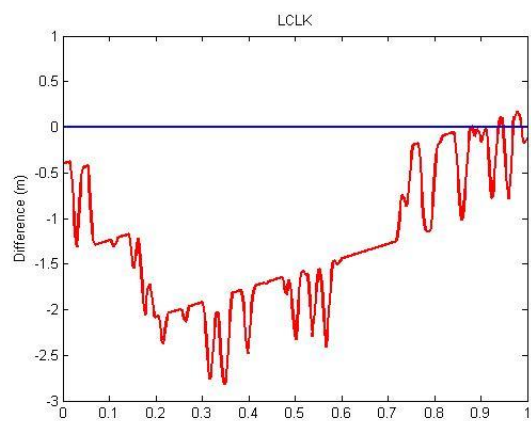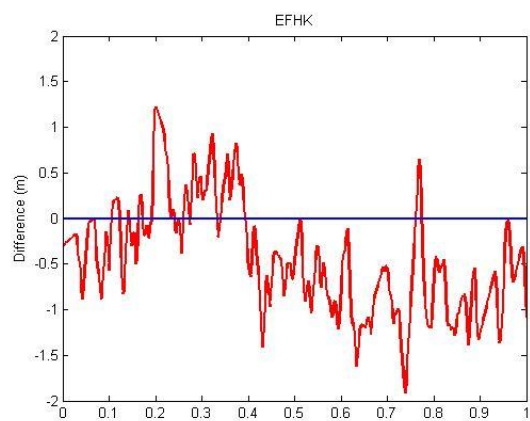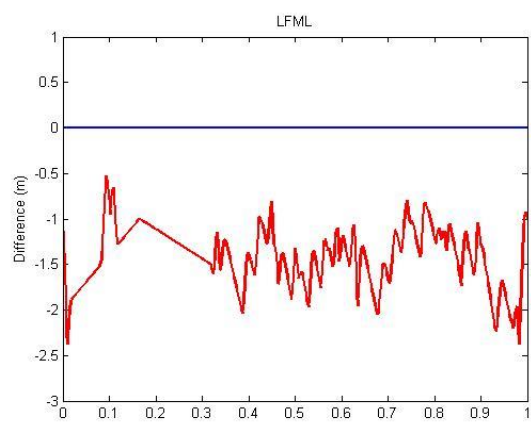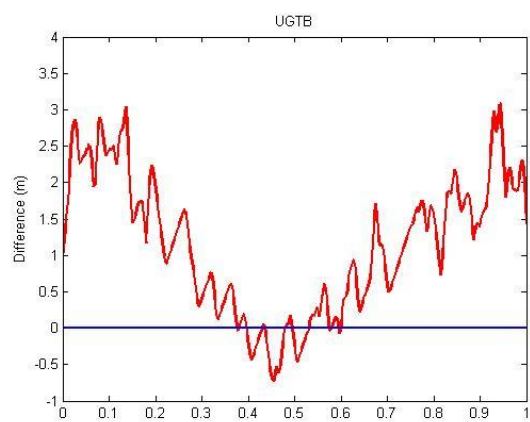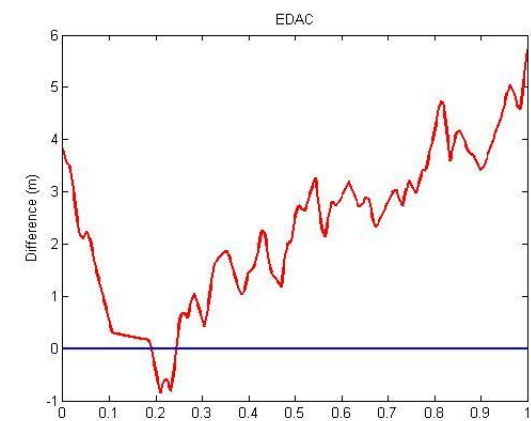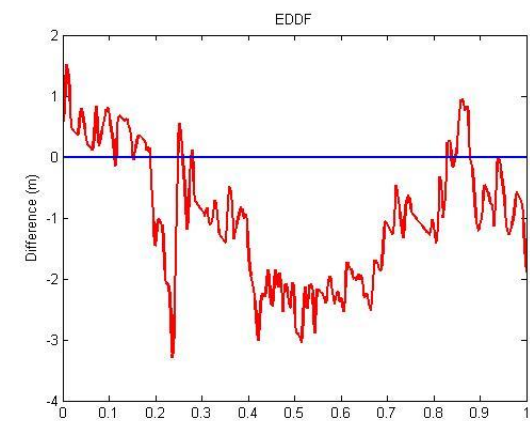

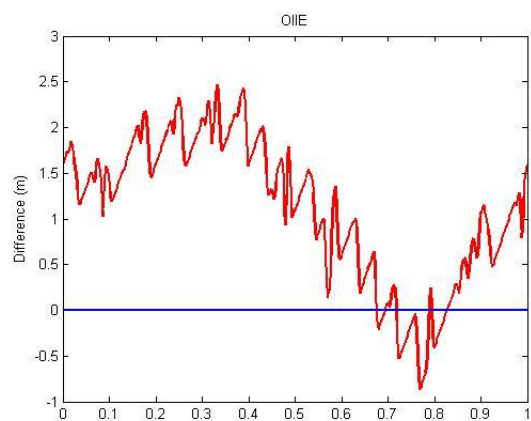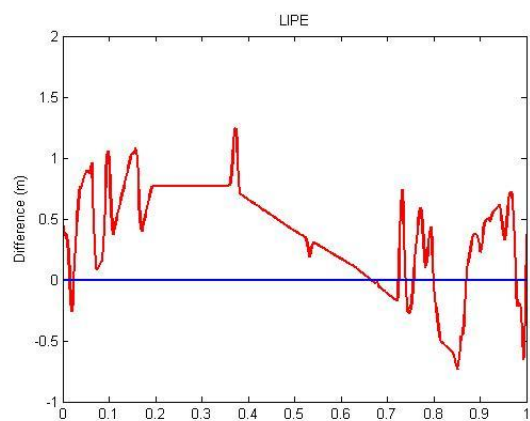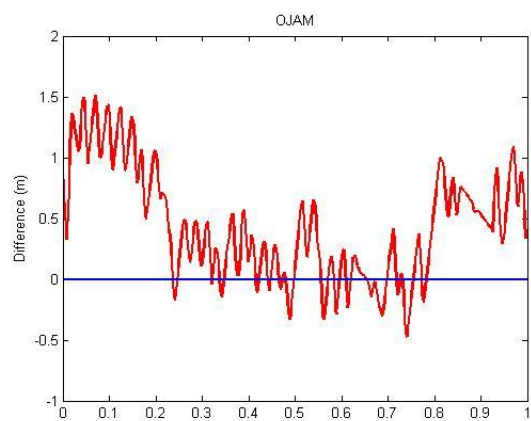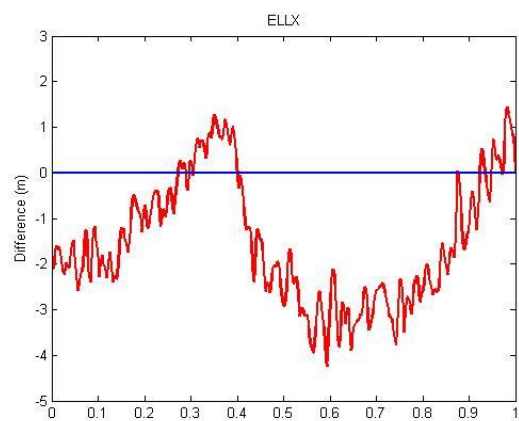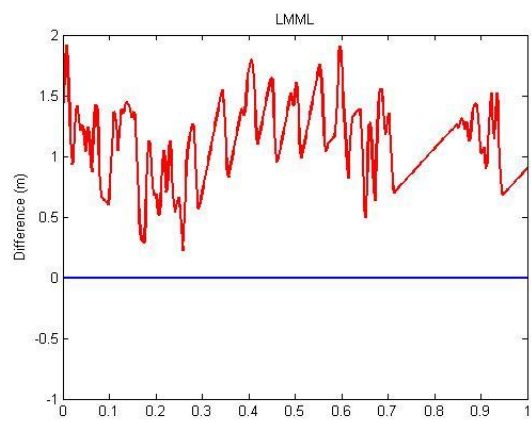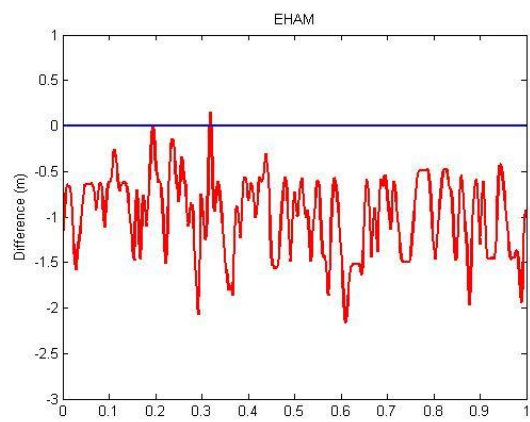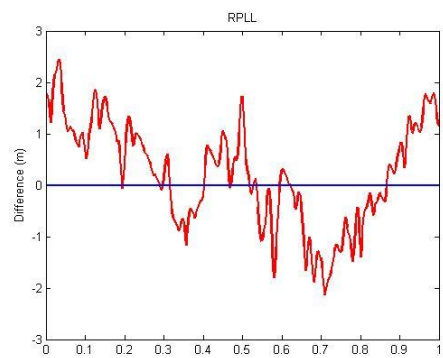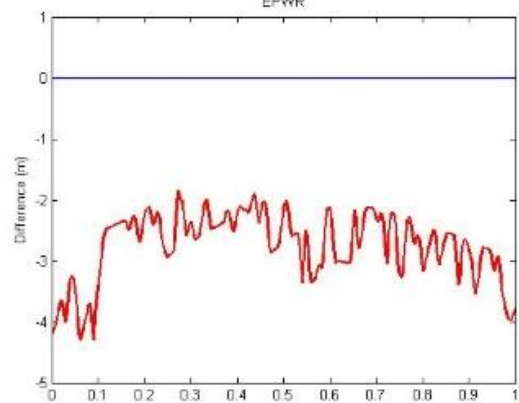

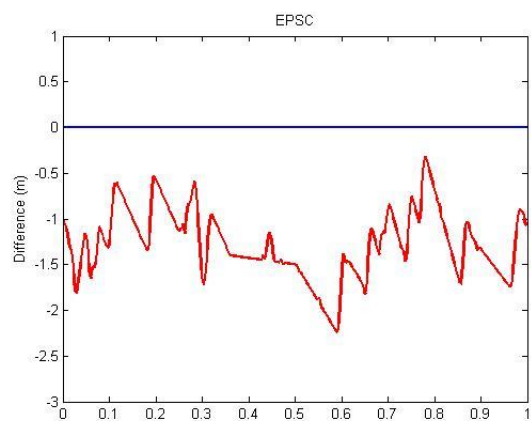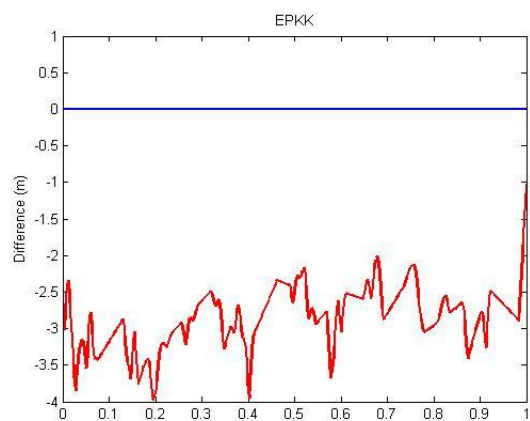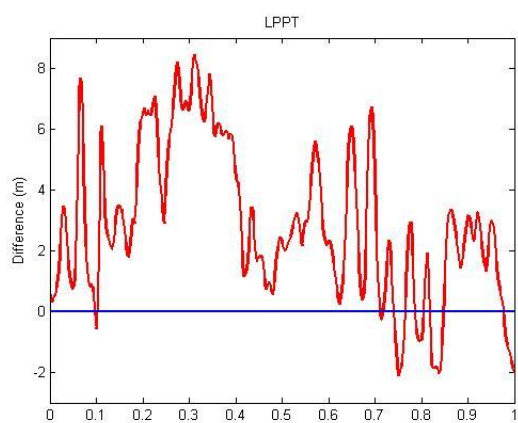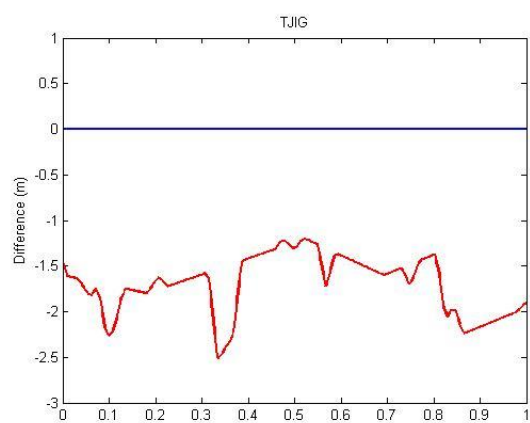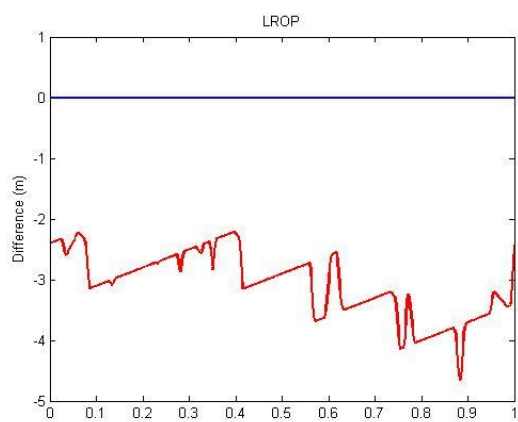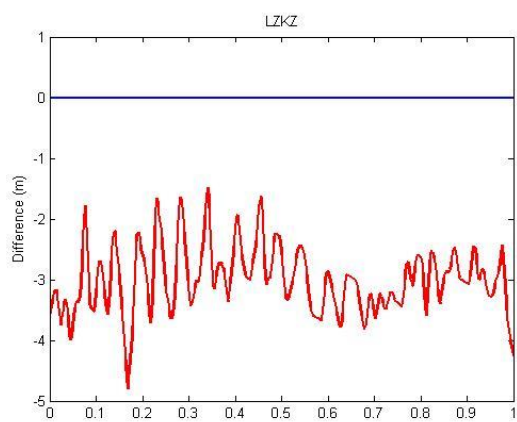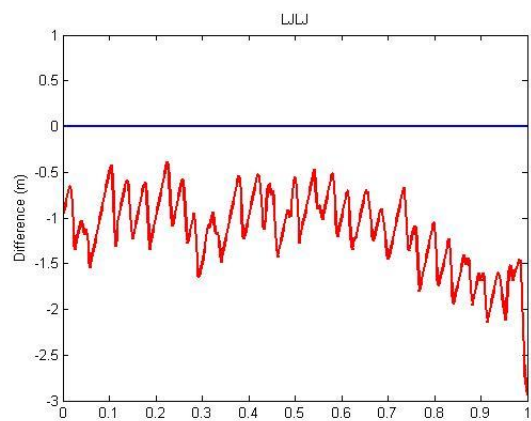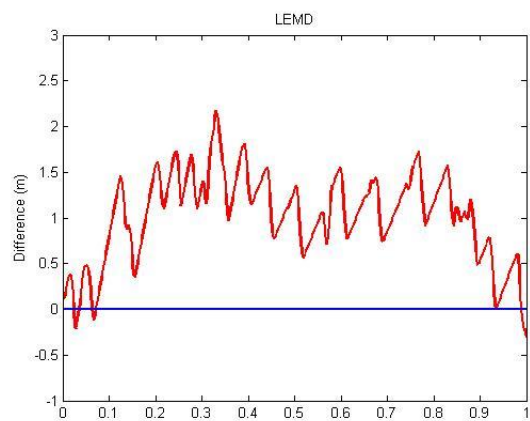

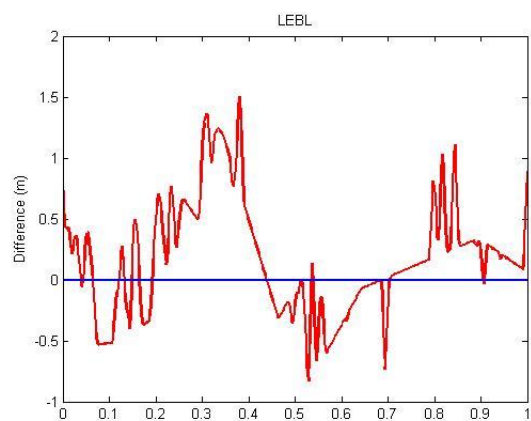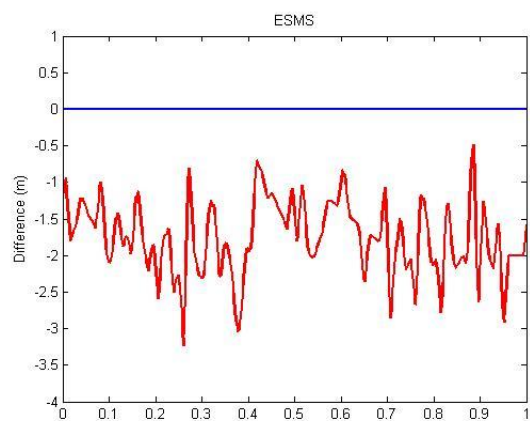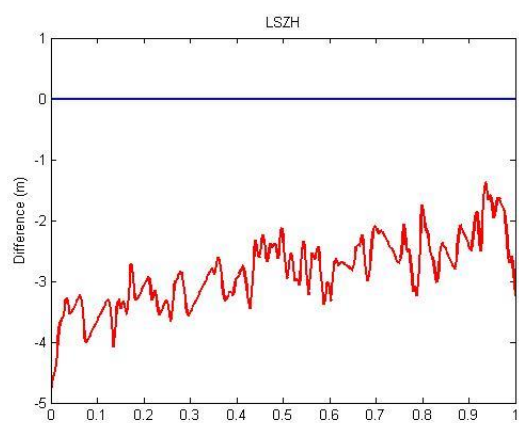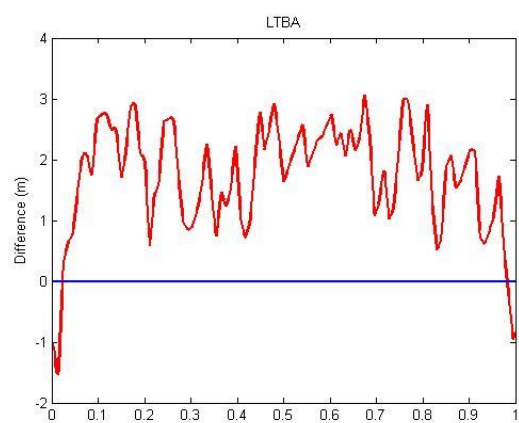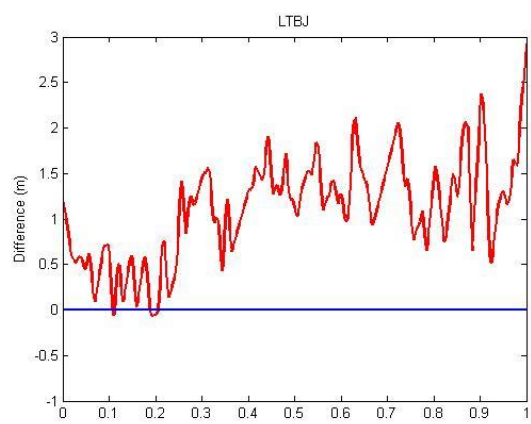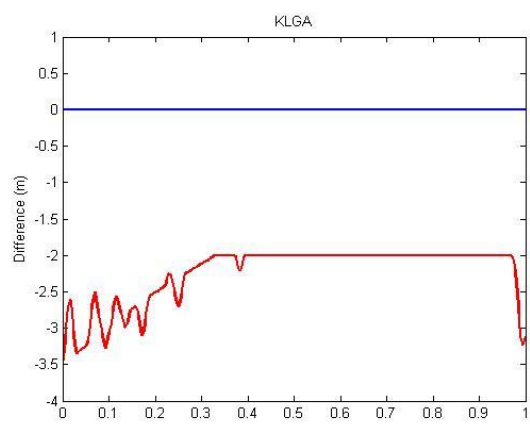

Supplement: Supplementary file 1 [file supplementary]
