# Supplementary figures and images for: On the Vertical Accuracy of the ALOS World 3D-30m Digital Elevation Model
Source: Preprints.org preprint supplement (doi:10.20944/preprints201708.0081.v1), 2017-08-24

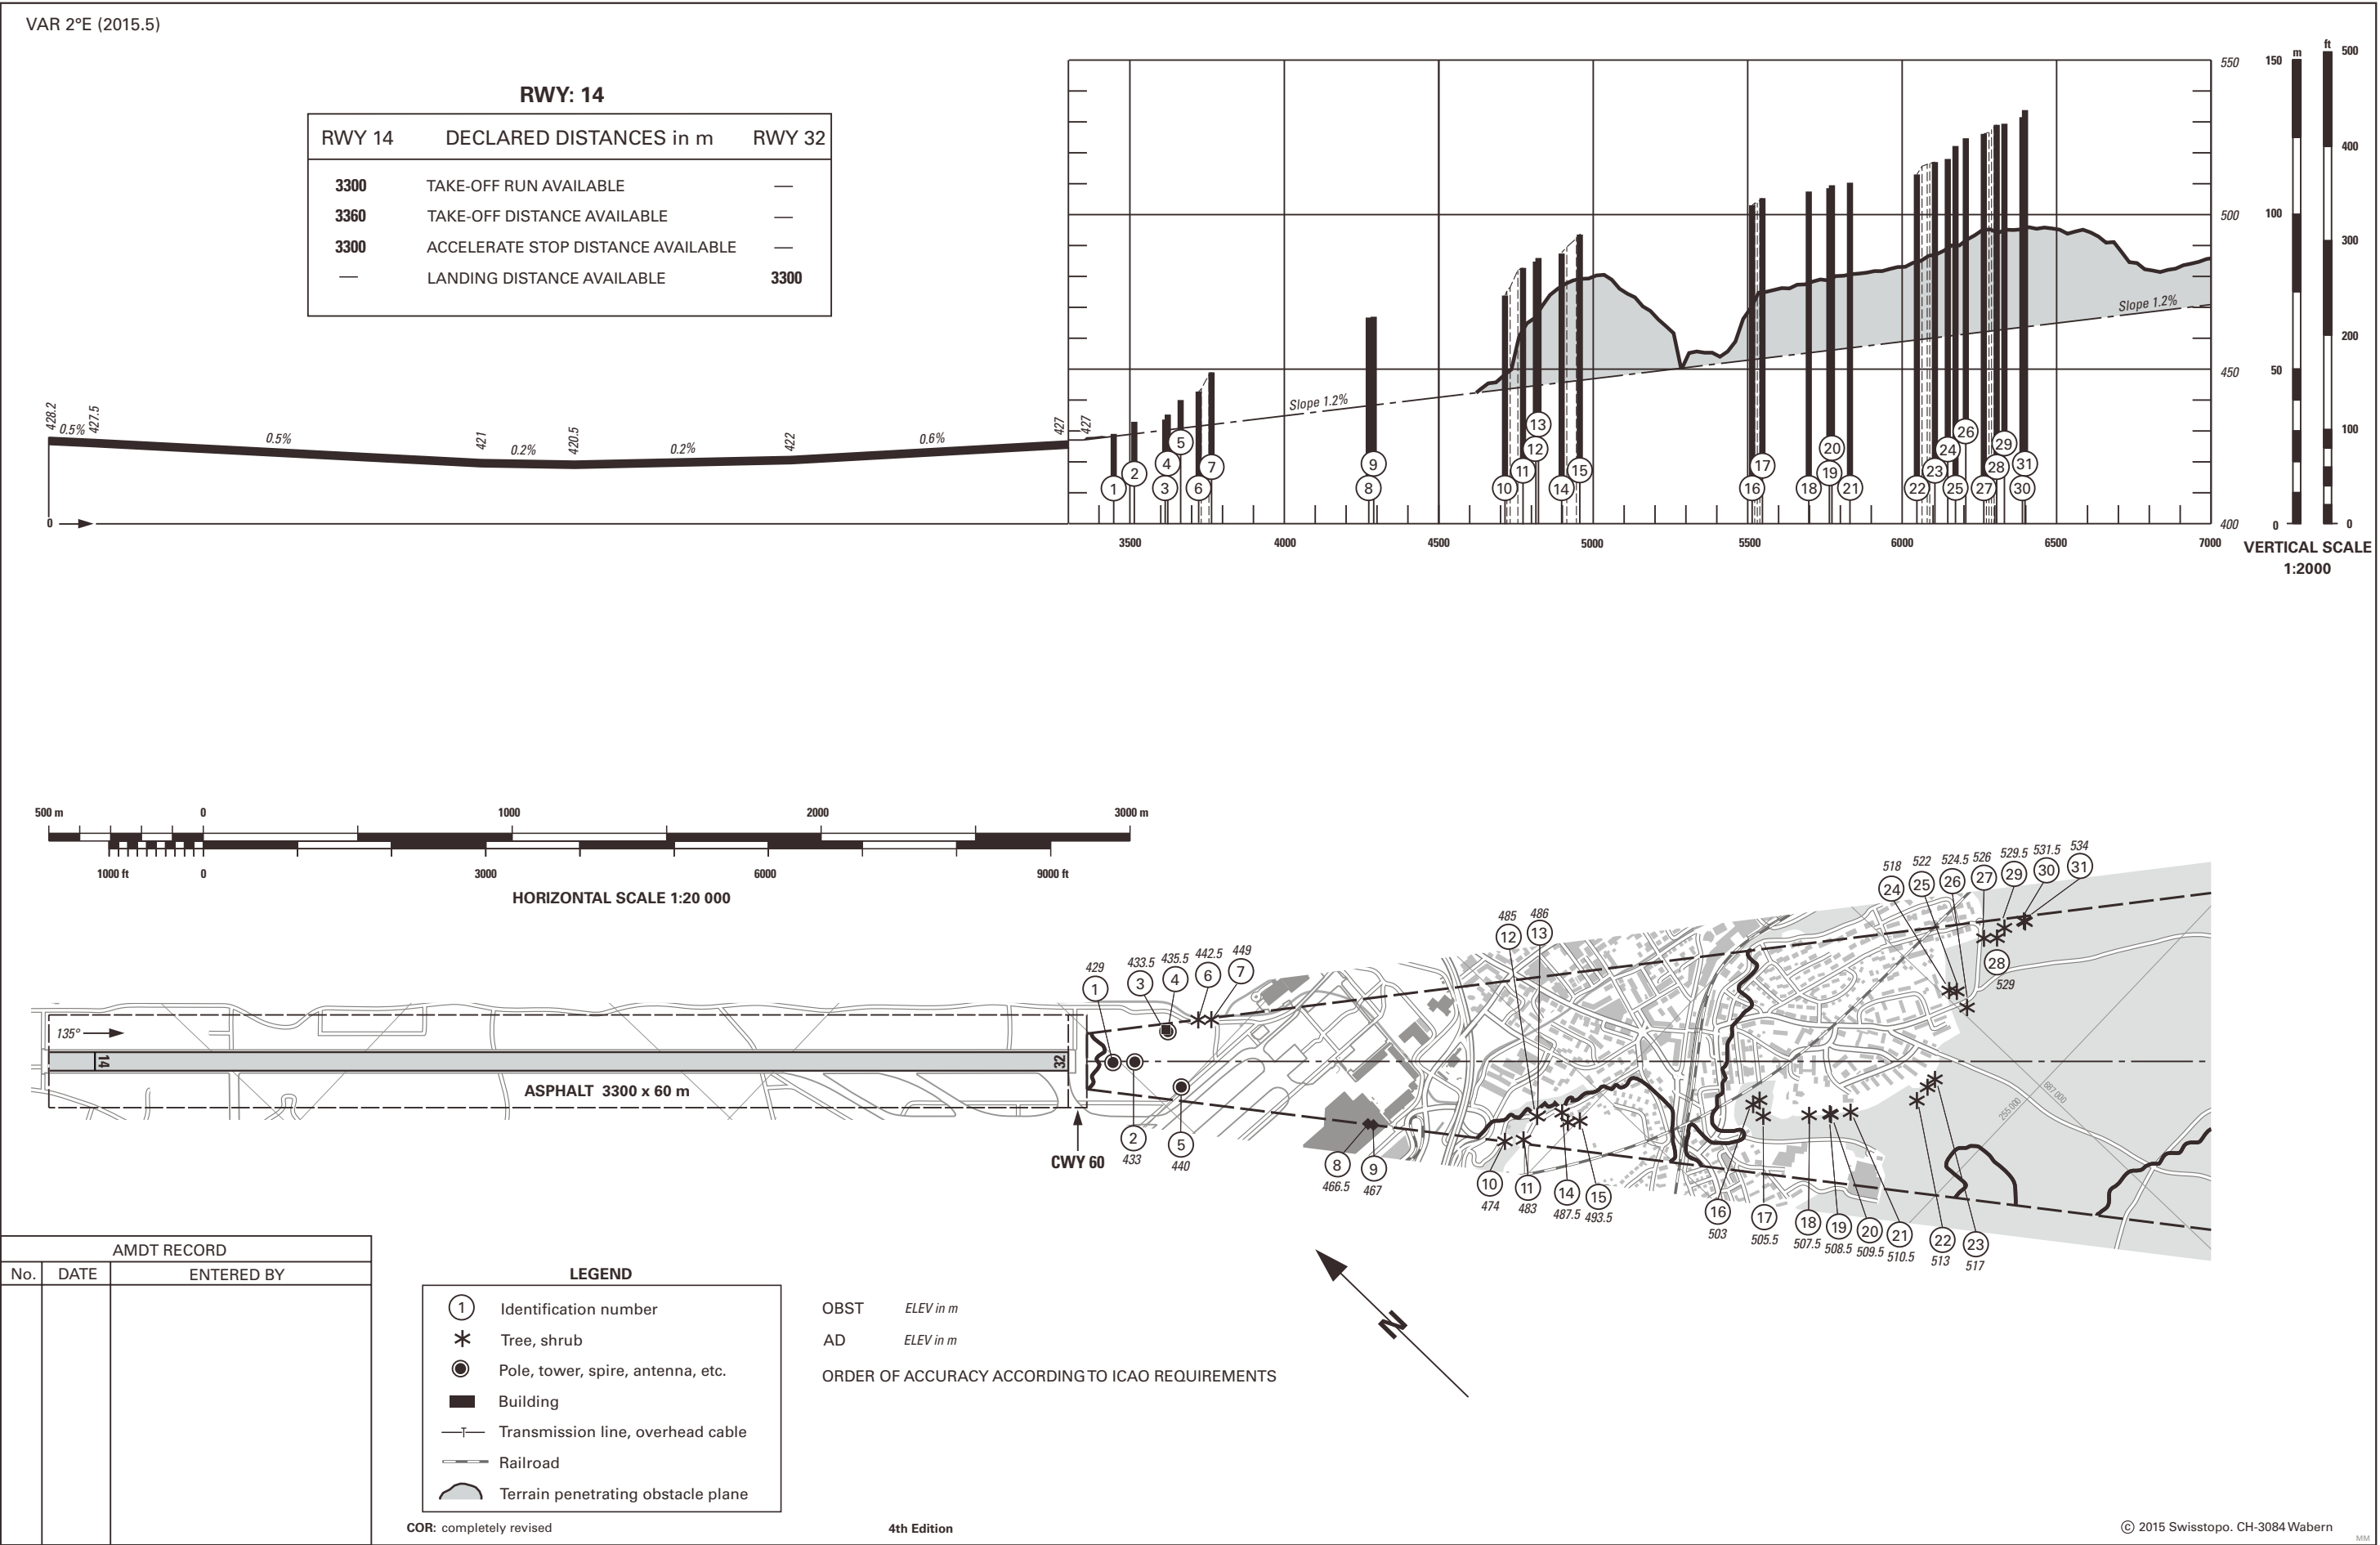

THIS PAGE INTENTIONALLY LEFT BLANK

Supplement: Supplementary file 2 [file supplementary]
